# Supplementary material for: Genetic insights into agronomic and morphological traits of drug-type cannabis revealed by genome-wide association studies
Source: Sci Rep. 2024 Apr 22;14:9162. doi: 10.1038/s41598-024-58931-w (PMC11033274; doi:10.1038/s41598-024-58931-w)
Supplement: Supplementary file 1 — Supplementary Figures. [file 41598_2024_58931_MOESM1_ESM.xlsx]

## Sheet: Supp. Figure S1
	Supplemental Figure S1: Population structure analysis of the 176 drug-type accessions using the whole 282K high-quality SNPs. Admixture plot for k values from 3 to 6 using FastSTRUCTURE. The vertical lines represents the drug-type accessions, and the y-axis represents the probability that an individual belongs to a subgroup.

## Sheet: Supp. Figure S2
		Supplemental Figure S2: Discriminant analysis of principal components (DAPC) of the 176 drug-type accessions using the whole 282K high-quality SNPs. a. Cumulated variance explained by the eigenvalues of the PCA. b. Value of BIC versus for increasing values of k. Cluster selection was based on the BIC value. c. Optimization α-score graph. The optimal α-score suggested that twenty PCs should be ret…

## Sheet: Supp. Figure S3
	Supplemental Figure S3: Heatmap of pairwise kinship matrix values between the 176 drug-type accessions. The color histogram showsthe distribution of co-ancestry coefficients. The more red the color, the more similar the individuals are, whereas the more yellow the color, the more dissimilar the individuals are.

## Sheet: Supp. Figure S4
	Supplemental Figure S4: Concordance of cluster assignment for FastSTRUCTURE and DAPC inference for (a) k=3 and (b) k=6 between .
	a.
	b.

## Sheet: Supplemental Figure S5
		Supplemental Figure S5: Distribution of agronomic traits for 176 drug-type accessions by k assignments. Phenotyping data were obtained from Lapierre et al., 2023. Letters represents significant difference according to Tukey's HSD test.

## Sheet: Supp. Figure S6
	Supplemental Figure S6: Quantile-quantile (QQ) plots of genome-wide association analysis with different statistical methods and agronomic traits. Marker-trait associations were performed with the Bayesian-information and linkage-disequilibrium iteratively nested keyway (BLINK) method.

## Sheet: Supp. Figure S7
	Supplemental Figure S7. Boxplot of the allelic classes of significant markers associated with agronomic and morphological traits in 176 drug-type Cannabis accessions.
