# Supplementary material for: Genetic insights into agronomic and morphological traits of drug-type cannabis revealed by genome-wide association studies
Source: Sci Rep. 2024 Apr 22;14:9162. doi: 10.1038/s41598-024-58931-w (PMC11033274; doi:10.1038/s41598-024-58931-w)
Supplement: Supplementary file 2 — Supplementary Tables. [file 41598_2024_58931_MOESM2_ESM.xlsx]

## Sheet: Supp. Table S1
	Supplemental Table S1. Description of agronomic and morphological traits in the 176 drug-type cannabis accessions. Data were provided by Lapierre et al. (2023).
	Accessions	Height (cm)	Fresh biomass (g)	Dried flower weight (g)	Sexual maturity (day)	Harvest maturity (day)	Node counts	Stem diameter (cm)	Canopy diameter (cm)	Internode length index
	AG-3	76.2	485	101.03	40	63	30	0.9144	85.09	0.21
	AG-4	84.328	720	145.03	42	63	26	0.8128	67.31	0.22
	AJ-1	77.47	565	93.03	28	56	18	0.6604	78.74	-0.13
	AJ-10	82.55	405	79.03	21	49	18	0.7366	62.23	-0.03
	AJ-11	67.564	435	79.03	23	49	13	0.6858	70.612	-0.59
	AJ-12	80.01	540	95.03	26	49	17	0.8382	76.2	-0.18
	AJ-13	69.85	675	131.03	22	57	15	0.7112	73.66	-0.21
	AJ-14	74.168	655	125.03	21	60	13	0.7366	74.93	-0.35
	AJ-15	76.2	710	138.03	21	55	12	0.7874	72.39	-0.75
	AJ-16	57.15	415	80.03	21	57	19	0.7112	61.722	-0.14
	AJ-17	46.99	225	46.03	28	56	15	0.6858	52.07	-0.1
	AJ-19	83.82	720	132.03	26	57	16	0.762	62.23	-0.49
	AJ-2	64.77	655	108.03	26	59	12	0.7874	53.34	-0.43
	AJ-20	77.47	720	122.03	22	59	18	0.762	56.642	0.01
	AJ-21	76.962	490	94.03	21	57	19	0.8128	58.42	-0.03
	AJ-22	59.69	490	83.03	23	56	20	0.8128	59.69	-0.01
	AJ-23	65.024	575	100.03	24	54	15	0.7874	65.024	-0.32
	AJ-24	50.8	530	95.03	21	54	14	0.8128	51.308	-0.21
	AJ-25	82.55	575	90.03	21	57	15	0.8128	63.5	-0.38
	AJ-26	77.47	745	128.03	24	57	16	0.8636	62.23	-0.11
	AJ-27	77.216	760	119.03	22	63	15	0.7874	59.944	-0.42
	AJ-28	69.342	830	146.03	20	55	17	0.9398	58.42	-0.11
	AJ-29	69.85	875	129.03	22	57	17	0.8128	54.61	-0.12
	AJ-3	79.756	670	110.03	26	54	17	0.7112	74.676	0.03
	AJ-30	72.39	670	118.03	22	57	15	0.762	67.31	-0.21
	AJ-31	87.376	615	122.03	35	57	16	0.7112	73.66	-0.35
	AJ-32	84.836	720	127.03	35	55	15	0.762	79.248	-0.43
	AJ-33	81.788	715	142.03	42	59	17	0.8382	86.36	-0.12
	AJ-34	74.93	635	115.03	21	59	15	0.8128	72.39	-0.38
	AJ-35	76.2	675	118.03	28	56	15	0.889	62.484	-0.6
	AJ-36	73.66	520	95.03	22	59	14	0.8128	70.104	-0.46
	AJ-37	77.216	630	119.03	44	62	15	0.8128	74.93	-0.26
	AJ-38	85.09	720	116.03	21	62	15	0.7366	66.04	-0.35
	AJ-39	81.788	810	147.03	22	60	14	0.8382	68.072	-0.45
	AJ-4	69.342	635	111.03	22	59	14	0.762	69.342	-0.6
	AJ-40	96.52	810	154.03	21	57	13	0.6604	84.582	-0.8
	AJ-41	88.646	725	155.03	23	63	11	0.7366	80.772	-1.13
	AJ-42	87.63	880	177.03	21	56	15	0.8636	68.58	-0.3
	AJ-43	80.01	765	135.03	28	56	14	0.8382	66.548	-0.38
	AJ-44	80.01	755	129.03	49	62	17	0.8382	58.42	-0.3
	AJ-45	84.836	760	130.03	49	55	18	0.8382	53.086	-0.12
	AJ-47	72.39	720	125.03	28	59	18	0.8636	67.31	-0.16
	AJ-49	69.088	725	108.03	21	52	19	0.762	71.882	-0.17
	AJ-5	60.96	635	109.03	22	57	17	0.7366	88.392	-0.27
	AJ-50	74.93	710	120.03	24	52	20	0.762	71.12	-0.14
	AJ-51	72.4154	710	135.03	27	53	16	0.7366	87.63	-0.32
	AJ-52	69.088	690	128.03	44	61	15	0.889	67.056	-0.21
	AJ-53	62.23	580	108.03	21	61	16	0.7366	54.61	-0.34
	AJ-54	59.69	490	81.03	21	57	19	0.762	62.23	0.02
	AJ-55	49.53	520	91.03	21	57	18	0.7366	57.15	-0.02
	AJ-56	73.66	485	97.03	26	52	20	0.7366	59.69	0.16
	AJ-57	77.978	735	133.03	35	56	16	0.762	69.342	-0.02
	AJ-58	85.09	720	129.03	21	53	17	0.7112	67.31	0.1
	AJ-59	76.962	715	122.03	23	60	17	0.762	54.61	-0.06
	AJ-6	61.468	550	88.03	20	56	16	0.8128	61.468	-0.13
	AJ-60	90.17	600	115.03	23	59	17	0.7874	58.42	-0.22
	AJ-61	83.82	710	126.03	21	60	16	0.762	74.93	-0.24
	AJ-62	96.774	760	131.03	22	58	20	0.8128	69.342	-0.42
	AJ-63	102.362	800	126.03	22	56	17	0.7874	79.248	-0.48
	AJ-64	109.22	815	142.03	21	62	16	0.8636	83.82	-0.43
	AJ-65	68.072	670	106.03	23	52	19	0.8382	69.088	-0.23
	AJ-7	77.47	675	113.03	20	59	19	0.889	57.15	-0.13
	AJ-8	75.438	645	105.03	20	58	16	0.7874	49.784	-0.23
	AJ-9	80.01	515	110.03	23	59	19	0.8128	48.26	-0.06
	AN-10	45.72	485	66	50	60	22	0.762	43.18	0.66
	AN-102	30.48	490	69.1	61	60	20	0.8128	43.18	0.74
	AN-103	27.94	365	35.6	64	66	18	0.7366	43.18	0.17
	AN-105	40.64	605	82.1	51	58	20	0.8128	48.26	0.24
	AN-107	25.4	380	42.2	50	60	20	0.889	40.64	0.2
	AN-11	34.29	375	62	50	65	20	0.8636	48.26	0.58
	AN-110	27.94	520	64.8	56	58	22	0.8128	52.07	0.41
	AN-111	30.48	375	40	50	64	22	0.889	43.18	0.66
	AN-116	38.1	540	69.3	47	60	22	0.8636	52.07	0.58
	AN-117	35.56	115	39.6	50	63	20	0.889	53.34	0.41
	AN-121	38.1	620	66.5	51	64	20	0.8128	49.53	0.68
	AN-126	30.48	570	60.2	68	74	20	1.016	48.26	1.27
	AN-127	33.02	520	61	47	60	18	0.9906	48.26	0.41
	AN-129	33.02	420	29.5	62	73	18	0.8128	55.88	0.32
	AN-131	34.29	535	65.9	50	60	20	0.762	43.18	0.65
	AN-14	38.1	580	79	50	54	20	0.8636	50.8	1
	AN-140	36.83	410	56.6	53	56	20	0.7874	48.26	0.62
	AN-141	22.225	280	35.5	57	64	21	0.8128	41.91	0.52
	AN-15	36.83	395	39.1	52	60	18	0.889	45.72	0.19
	AN-17	36.83	535	42.1	50	65	20	0.9144	53.34	0.78
	AN-19	27.94	440	56	53	60	18	0.9398	49.53	0.64
	AN-21	33.02	510	71.4	52	60	22	0.8128	55.88	0.7
	AN-24	33.02	600	70.6	50	58	18	1.016	50.8	0.6
	AN-26	26.67	445	68.7	57	56	16	0.9906	50.8	0.75
	AN-27	36.83	565	74.7	50	58	22	0.8636	59.69	0.87
	AN-30	35.56	485	70.7	47	60	20	0.8382	48.26	0.82
	AN-31	48.26	555	80.5	57	56	22	0.889	49.53	0.46
	AN-33	43.18	645	74.2	47	60	20	0.9652	55.88	0.41
	AN-37	40.64	490	63.7	50	60	26	0.9652	50.8	0.09
	AN-40	49.53	535	55.5	58	60	22	0.9144	54.61	0.2
	AN-41	35.56	395	73.3	56	65	20	0.8128	43.18	0.48
	AN-44	27.94	535	68.3	62	60	20	0.9398	46.99	0.9
	AN-45	31.75	400	50.5	62	63	22	0.8382	48.26	0.47
	AN-5	34.29	355	61.8	47	65	20	0.889	54.61	0.5
	AN-51	39.37	625	86.3	54	56	22	0.889	49.53	0.59
	AN-53	26.67	275	23.4	55	65	16	0.8382	46.99	0.26
	AN-55	30.48	510	78.5	50	58	20	0.8128	49.53	0.93
	AN-59	35.56	610	80.8	54	57	19	0.9144	50.8	0.76
	AN-63	54.61	510	73.8	65	63	22	0.8636	45.72	1.36
	AN-66	30.48	315	38.1	51	53	24	0.762	38.1	0.59
	AN-67	35.56	430	74	51	60	18	0.8636	49.53	0.68
	AN-7	41.91	625	79.4	58	63	22	0.9652	49.53	1
	AN-71	40.64	535	79.4	57	63	24	0.9398	52.07	0.67
	AN-74	39.37	565	65.8	50	60	22	0.9398	63.5	0.36
	AN-75	30.48	475	71.7	54	60	20	0.8636	52.07	0.55
	AN-83	71.12	525	78.3	56	64	18	0.8128	50.8	0.8
	AN-86	41.91	535	63.3	51	60	18	0.8382	50.8	0.67
	AN-91	29.21	235	47.4	50	60	22	0.7112	52.07	0.43
	AN-93	35.56	535	65.1	58	60	18	0.8636	43.18	0.33
	AO-1	63.5	625	93.03	48	66	24	0.6858	50.8	0.07
	AO-10	48.26	490	56.93	50	72	26	0.7112	48.26	0.03
	AO-101	55.88	660	82.03	48	70	26	0.8636	40.64	0.52
	AO-102	53.34	755	103.43	48	66	24	0.8382	68.58	0.5
	AO-111	52.07	695	88.63	55	70	24	0.8128	52.07	0.35
	AO-115	39.37	465	54.03	63	72	22	0.7366	40.64	0.06
	AO-118	43.18	860	115.13	55	63	24	0.9144	48.26	0.28
	AO-125	53.34	760	122.43	48	63	20	0.889	63.5	0.23
	AO-14	55.88	795	86.63	55	63	22	0.9398	60.96	0.75
	AO-140	40.64	555	60.53	46	70	22	0.8382	58.42	0.31
	AO-143	48.26	405	40.33	60	70	24	0.6604	52.07	0.17
	AO-146	52.07	735	90.53	48	70	26	0.8128	58.42	0.22
	AO-153	54.61	700	76.83	50	70	22	0.762	63.5	0.1
	AO-157	43.18	480	55.03	55	72	22	0.8128	55.88	0.24
	AO-160	45.72	645	89.83	48	66	24	0.8128	53.34	0.5
	AO-166	48.26	705	80.13	48	70	24	0.8128	53.34	0.03
	AO-168	50.8	630	72.53	55	70	24	0.889	50.8	0.33
	AO-17	54.61	845	103.13	42	72	20	0.889	71.12	0.2
	AO-173	48.26	685	50.73	67	66	20	0.889	45.72	-0.12
	AO-176	38.1	490	56.43	64	70	22	0.8128	48.26	0.51
	AO-178	50.8	650	91.63	63	70	20	0.7874	60.96	0.18
	AO-182	72.39	1260	159.63	48	72	24	0.9906	66.04	0.94
	AO-188	43.18	710	108.03	63	70	24	0.8382	63.5	0.74
	AO-191	36.83	685	105.53	67	66	20	0.762	52.07	1.08
	AO-192	59.69	750	97.96	48	63	22	0.8636	53.34	0.39
	AO-196	38.1	660	83.73	55	70	22	0.8382	50.8	0.43
	AO-198	55.88	1000	141.13	50	63	24	0.8382	58.42	0.72
	AO-201	40.64	570	70.86	55	66	22	0.7874	48.26	0.86
	AO-205	48.26	695	102.53	48	70	22	0.7112	55.88	0.51
	AO-209	40.64	625	80.43	64	63	20	0.7874	50.8	0.46
	AO-211	40.64	710	91.73	55	63	20	0.8382	50.8	0.69
	AO-214	53.34	595	79.83	48	66	20	0.7874	48.26	0.59
	AO-217	40.64	650	88.33	55	72	20	0.7874	45.72	0.62
	AO-220	52.07	665	84.53	48	70	24	0.7112	48.26	0.29
	AO-225	40.64	630	76.03	48	72	24	0.7366	50.8	0.9
	AO-227	58.42	860	120.63	48	66	24	0.7874	55.88	0.35
	AO-229	50.8	570	59.36	63	66	20	0.8636	53.34	0.4
	AO-24	35.56	640	60.23	55	72	24	0.762	43.18	0.56
	AO-25	33.02	605	51.43	55	66	24	0.762	40.64	0.65
	AO-30	41.91	600	83.03	55	66	22	0.7366	40.64	0.31
	AO-31	30.48	340	40.33	67	66	20	0.508	33.02	1.04
	AO-34	74.93	650	96.13	46	66	32	0.762	53.34	0.45
	AO-38	60.96	905	124.13	48	66	24	0.889	66.04	0.37
	AO-43	50.8	760	107.93	48	66	22	0.889	48.26	0.68
	AO-47	43.18	565	47.43	48	72	22	0.7874	48.26	1.01
	AO-49	58.42	1000	146.53	48	63	22	0.8128	60.96	0.38
	AO-5	40.64	695	72.13	50	63	22	0.7366	38.1	0.6
	AO-52	35.56	440	55.53	55	72	22	0.6096	50.8	0.29
	AO-56	45.72	475	106.83	50	63	22	0.9398	54.61	0.78
	AO-58	48.26	925	141.53	50	66	22	0.9652	55.88	0.99
	AO-62	35.56	530	62.63	54	66	22	0.6858	48.26	0.33
	AO-65	38.1	475	72	48	123	20	0.70866	40.64	0.25
	AO-71	54.61	355	39.83	39	63	20	0.6858	48.26	0.15
	AO-74	53.34	230	25.03	39	59	20	0.5588	43.18	0.01
	AO-75	38.1	605	81.33	46	66	25	0.6858	40.64	0.17
	AO-8	43.18	550	68.43	63	66	22	0.8128	48.26	0.45
	AO-80	40.64	815	113.83	48	66	24	0.8128	50.8	0.5
	AO-83	38.1	475	62.13	46	70	24	0.7366	45.72	0.38
	AO-84	45.72	925	95.03	55	80	20	1.2446	53.34	0.31
	AO-87	52.07	440	27.43	48	70	20	0.8636	63.5	0.15
	AO-90	50.8	665	98.53	50	66	26	0.7874	48.26	0.37
	AO-93	54.61	625	79.13	48	66	24	0.7366	63.5	0.18
	AO-98	25.4	90	6.02	25	38	24	0.3556	30.48	0.08

## Sheet: Supp. Table S2
	Supplemental Table S2: Description of filtering process and retained markers.
		Step	SNP count
	pre-imputation	Quality filter	2765238
		MAF 1% & Missing data > 80%	798965
		min/max allele count 2	655281
	post-imputation	MAF 1% & min/max allele count 2	548921
		Heterozygous > 50%	520918
		MAF 6%	288280
		SNPs on scaffold	282022

## Sheet: Supp. Table S3
	Supplemental Table S3: Genome distribution of markers, LD and haplotype block (HB).
		SNPs					LD decaya		Haplotypes
	Chr.	SNP count	Density (SNP/Mb)	MAFb (%)	Heterozygous (%)	Prop. SNPs on genesc (%)	r2=0.2	r2=0.5	HB Count	Density (HB/Mb)	Mean spand (kb)	Max span (kb)	Prop. of SNP in HB (%)
	1	20706	204.586	22	26.2	38.3	56.2943	24.2446	3264	32.25	4.0415	126.755	65.6
	2	38278	397.293	21.2	24.6	19.7	59.6169	25.6756	5819	60.3963	3.54126	143.231	66.6
	3	33816	357.196	22.8	24.6	17.7	130.72	56.2979	5192	54.8428	4.12323	191.165	68.9
	4	28474	309.79	21.7	25.9	21.7	113.401	48.8392	4444	48.3496	4.72132	178.791	65.7
	5	31368	355.721	21.1	25.4	16.5	73.7487	31.7618	4970	56.361	3.57328	143.557	63.4
	6	36257	457.011	21.6	26.2	21.1	52.5611	22.6368	5749	72.4648	2.87451	188.872	62.6
	7	26630	373.817	21.7	24.9	19.1	107.141	46.1429	4129	57.9606	3.62089	99.275	65.8
	8	20115	311.271	22	26.2	28.3	94.6811	40.7769	3234	50.0447	4.28216	185.098	66.2
	9	23799	386.592	22.1	25.9	23.4	71.8882	30.9606	3751	60.9313	3.23489	191.751	65.8
	X	22579	215.064	20.7	25.7	23	206.629	88.9904	3694	35.1852	4.8267	160.867	66.2
	WG	282022	330.211	21.7	25.5	22	86.721	37.3487	44246	51.8063	3.88397	191.751	65.6
	aMean intra-chromosomal LD at
	bMAF: minor allele frequency
	cProportion of the 282K SNPs located on annotated genes
	dPhysical distance is defined by the 5’-most and 3’-most marker of the HB

## Sheet: Supp. Table S4
	Supplemental Table S4. Description of clustering assignments of the 176 drug-type accessions obtained by FastStructure and DAPC analysis.
	Accessions	FastStructure clustering (K=3)	DAPC clustering
	AG-3	3	3
	AG-4	1	1
	AJ-1	3	3
	AJ-10	3	3
	AJ-11	3	3
	AJ-12	3	3
	AJ-13	3	3
	AJ-14	3	3
	AJ-15	3	3
	AJ-16	3	3
	AJ-17	1	1
	AJ-19	3	3
	AJ-2	2	2
	AJ-20	2	2
	AJ-21	3	3
	AJ-22	3	3
	AJ-23	3	3
	AJ-24	2	2
	AJ-25	3	3
	AJ-26	3	3
	AJ-27	2	2
	AJ-28	2	2
	AJ-29	2	2
	AJ-3	3	3
	AJ-30	2	2
	AJ-31	3	2
	AJ-32	2	2
	AJ-33	3	3
	AJ-34	2	2
	AJ-35	3	3
	AJ-36	2	2
	AJ-37	3	3
	AJ-38	3	3
	AJ-39	3	3
	AJ-4	1	1
	AJ-40	3	3
	AJ-41	3	3
	AJ-42	3	3
	AJ-43	3	3
	AJ-44	2	2
	AJ-45	3	3
	AJ-47	3	3
	AJ-49	1	1
	AJ-5	3	3
	AJ-50	1	1
	AJ-51	1	1
	AJ-52	1	3
	AJ-53	3	3
	AJ-54	3	3
	AJ-55	3	3
	AJ-56	2	2
	AJ-57	3	3
	AJ-58	3	3
	AJ-59	3	3
	AJ-6	3	3
	AJ-60	2	2
	AJ-61	2	2
	AJ-62	3	3
	AJ-63	3	3
	AJ-64	3	3
	AJ-65	1	3
	AJ-7	2	2
	AJ-8	3	3
	AJ-9	2	2
	AN-10	3	3
	AN-102	2	2
	AN-103	3	2
	AN-105	3	3
	AN-107	2	2
	AN-11	3	3
	AN-110	2	2
	AN-111	2	2
	AN-116	3	3
	AN-117	3	3
	AN-121	3	3
	AN-126	1	1
	AN-127	2	2
	AN-129	2	2
	AN-131	3	3
	AN-14	2	2
	AN-140	3	3
	AN-141	3	3
	AN-15	2	2
	AN-17	1	1
	AN-19	1	1
	AN-21	3	3
	AN-24	3	3
	AN-26	3	3
	AN-27	2	2
	AN-30	1	1
	AN-31	3	3
	AN-33	3	3
	AN-37	2	2
	AN-40	3	3
	AN-41	2	2
	AN-44	2	2
	AN-45	3	3
	AN-5	3	3
	AN-51	3	3
	AN-53	3	3
	AN-55	3	3
	AN-59	3	3
	AN-63	2	2
	AN-66	3	3
	AN-67	2	2
	AN-7	3	3
	AN-71	1	1
	AN-74	2	2
	AN-75	3	2
	AN-83	3	3
	AN-86	1	1
	AN-91	1	3
	AN-93	1	1
	AO-1	1	1
	AO-10	3	3
	AO-101	1	3
	AO-102	2	2
	AO-111	2	2
	AO-115	2	2
	AO-118	2	2
	AO-125	2	2
	AO-14	1	1
	AO-140	2	2
	AO-143	2	2
	AO-146	3	3
	AO-153	1	1
	AO-157	3	3
	AO-160	3	3
	AO-166	3	3
	AO-168	2	2
	AO-17	3	3
	AO-173	2	2
	AO-176	2	2
	AO-178	2	2
	AO-182	2	2
	AO-188	1	1
	AO-191	2	2
	AO-192	3	3
	AO-196	2	2
	AO-198	2	2
	AO-201	3	3
	AO-205	2	2
	AO-209	2	2
	AO-211	1	1
	AO-214	3	2
	AO-217	3	3
	AO-220	1	1
	AO-225	3	3
	AO-227	3	3
	AO-229	3	3
	AO-24	3	3
	AO-25	3	3
	AO-30	3	3
	AO-31	1	1
	AO-34	2	2
	AO-38	2	1
	AO-43	2	2
	AO-47	1	1
	AO-49	1	1
	AO-5	1	1
	AO-52	3	3
	AO-56	3	3
	AO-58	1	3
	AO-62	1	1
	AO-65	1	1
	AO-71	2	2
	AO-74	3	3
	AO-75	1	1
	AO-8	1	1
	AO-80	1	1
	AO-83	1	1
	AO-84	3	3
	AO-87	3	2
	AO-90	2	2
	AO-93	1	1
	AO-98	1	1
